# Supplementary material
Source: Springer Nature journal article supplement (https://www.springermedizin.de/resource/supplementary/12888_2012_1363_MOESM1_ESM.pdf/9480016)
Supplement: MOESM1 [file 9480016]

## QUESTIONNAIRE

### **Depression assessment in elderly population of Karachi, Pakistan: A cross sectional survey**

Student of MSc. Epidemiology and Biostatistics  
Class of 2009  
Community Health Sciences, The Aga Khan University, Karachi  
Phone #: 4864857

**Questionnaire Number**

 

Name of Household Head: \_\_\_\_\_

Address: \_\_\_\_\_

Name of Locality / Area: \_\_\_\_\_

Cluster Number: \_\_\_\_\_

Household Number: \_\_\_\_\_

| <b>INTERVIEWER'S VISITS</b> |          |          |          |                        |
|-----------------------------|----------|----------|----------|------------------------|
|                             | <b>1</b> | <b>2</b> | <b>3</b> | <b>Final Visit</b>     |
| <b>Date</b>                 | _____    | _____    | _____    | <b>Day</b> _____       |
| <b>Interviewer Name</b>     | _____    | _____    | _____    | <b>Month</b> _____     |
|                             |          |          |          | <b>Year</b> _____      |
|                             |          |          |          | <b>Inte #</b> _____    |
| <b>Result</b>               | _____    | _____    | _____    | <b>Result</b> _____    |
| <b>Next Visit Date:</b>     |          |          |          | <b>Total Number</b>    |
| <b>Time:</b>                | _____    | _____    | _____    | <b>of Visits</b> _____ |

**Result Codes:**

1. Completed
2. No household member at home or no competent respondent at home at time of visit
3. Entire household absent for extended period of time
4. Postponed
5. Refused
6. House vacant or address not a house
7. House destroyed
8. House not found
9. Others-----

| <b>FIELD SUPERVISOR</b> | <b>FIELD MANAGER</b> | <b>PRINCIAL INVESTIGATOR</b> | <b>DATA ENTRY</b> |
|-------------------------|----------------------|------------------------------|-------------------|
| NAME_____               | NAME_____            | NAME_____                    | NAME_____         |
| _____                   | _____                | _____                        | _____             |
| DATE_____               | DATE_____            | DATE_____                    | DATE_____         |

| <b>HOUSEHOLD QUESTIONNAIRE</b> |                                                                                            |                                                                                                                 |             |                 |
|--------------------------------|--------------------------------------------------------------------------------------------|-----------------------------------------------------------------------------------------------------------------|-------------|-----------------|
| <b>S.No.</b>                   | <b>Questions</b>                                                                           | <b>Code</b>                                                                                                     | <b>Skip</b> | <b>Response</b> |
| <b>A1</b>                      | How many persons usually live in this household?                                           | 88 = Don't know<br>99 = No response                                                                             |             | -----           |
| <b>A2</b>                      | What is the type of family you have? Is it joint or nuclear or other than these mentioned? | 1 = Joint,<br>2 = Nuclear<br>3 = Alone<br>Others (specify)                                                      |             | -----           |
| <b>A3</b>                      | Is it your own or rented accommodation?                                                    | 1 = Family owned,<br>2 = Rented,<br>3 = Owned by other relative,<br>4 = Official residence,<br>Others (specify) |             | -----           |
| <b>A4</b>                      | What is your Religion?                                                                     | 1=Muslim,<br>2=Hindu,<br>3=Christian,<br>4=Parsi,<br>Other (specify)                                            |             | -----           |

### HOUSEHOLD SCHEDULE

We would like to obtain information about the people who usually live in this household

| Line No.  | Usual Residents                                                       | Relationship with the head of household (see codes below) | Sex                 | Age                | Education (See codes below) | Marital Status                                                         | Occupation (See codes below) | Ask if not working (retired) For past how many years is he/she not working? |
|-----------|-----------------------------------------------------------------------|-----------------------------------------------------------|---------------------|--------------------|-----------------------------|------------------------------------------------------------------------|------------------------------|-----------------------------------------------------------------------------|
|           | Please give me the names of persons who usually live in the household | What is the relationship to the head of household?        | 1=Male.<br>2=Female | In completed years |                             | 1=Married<br>2=Widowed<br>3=Separated<br>4=Divorced<br>5=Never married | If working skip to C1        |                                                                             |
| <b>B1</b> | <b>B2</b>                                                             | <b>B3</b>                                                 | <b>B4</b>           | <b>B5</b>          | <b>B6</b>                   | <b>B7</b>                                                              | <b>B8</b>                    | <b>B9</b>                                                                   |
| i         |                                                                       |                                                           |                     |                    |                             |                                                                        |                              |                                                                             |
| ii        |                                                                       |                                                           |                     |                    |                             |                                                                        |                              |                                                                             |
| iii       |                                                                       |                                                           |                     |                    |                             |                                                                        |                              |                                                                             |
| iv        |                                                                       |                                                           |                     |                    |                             |                                                                        |                              |                                                                             |
| v         |                                                                       |                                                           |                     |                    |                             |                                                                        |                              |                                                                             |
| vi        |                                                                       |                                                           |                     |                    |                             |                                                                        |                              |                                                                             |
| vii       |                                                                       |                                                           |                     |                    |                             |                                                                        |                              |                                                                             |
| viii      |                                                                       |                                                           |                     |                    |                             |                                                                        |                              |                                                                             |

**Codes Relationship to Head of Household:**

1=Head, 2=Wife or husband, 3=Son or daughter,  
4=Son in law or daughter in law, 5=Grandchild,  
6=Parent, 7=Parent in law, 8=Brother or sister,  
9=Other relative, 10=-Adopted/step child,  
11=Not related, Others specify,  
88=Don't know, 99= No response

**Codes for Education:**

1=Illiterate, 2=Literate (no formal schooling),  
3=Upto 5<sup>th</sup>, 4=Upto Matric, 5=11-14 class,  
6=MA/MSc./MBBS/MBA or above,  
Others specify,88= Don't know, 99=No response.

**Codes for Occupation:**

**Working:**

1=Professional/Executive, 2=Manager/Supervisor,  
3=Office/clerk work, 4=Sales workers, 5=Skilled factory worker,  
6=Skilled non factory worker, 7=Labourer, 8=Household helpers  
(drivers, cook, chawkidaar), 9=Commercial vehicle operators,  
10=Self employed, 11=Small venders, 12=Agriculturist,  
13=Business, Others specify, 88= Don't know, 99=No response

**Non working:**

15=retired and gets pension, 16= retired and doesn't get pension,  
17=too old/ill to work, 18=disabled, 19=Unemployed,  
20=housewife, 77=Others specify,  
88= Don't know, 99=No response.

| <b>HOUSING CHARACTERISTICS &amp; LIVING STANDARDS</b> |                                                                                   |                                                                                                                                                                                                          |             |                    |
|-------------------------------------------------------|-----------------------------------------------------------------------------------|----------------------------------------------------------------------------------------------------------------------------------------------------------------------------------------------------------|-------------|--------------------|
| <b>S.No</b>                                           | <b>Questions</b>                                                                  | <b>Coding</b>                                                                                                                                                                                            | <b>Skip</b> | <b>Response</b>    |
| <b>C1</b>                                             | What is the main source of drinking water in this household?                      | 1 = Independent tap<br>2 = Public tap<br>3 = Own hand pump<br>4 = Public hand pump<br>5 = Public well<br>6 = Tanker<br>7 = Mineral water bottle<br>88 = Don't know<br>99 = No response<br>Others specify |             | -----              |
| <b>C2</b>                                             | How many rooms are in this house? (excluding verandah and kitchen)                | 88 = Don't know<br>99 = No response                                                                                                                                                                      |             | -----              |
| <b>C3</b>                                             | What toilet facility is available to you?                                         | 1=Flush toilet<br>2=Traditional dry toilet<br>3=Public latrine<br>4=No facility on Premises<br>88=Don't know<br>99=No response<br>Others specify                                                         |             | -----              |
| <b>C4</b>                                             | Does your household have any of the following for self use:<br>A. Air conditioner | 1 = Yes<br>2 = No<br><br>If yes, how many                                                                                                                                                                |             | _____<br><br>_____ |
|                                                       | B. Personal Computer                                                              | 1 = Yes<br>2 = No<br><br>If yes, how many                                                                                                                                                                |             | _____<br><br>_____ |
|                                                       | C. Internet                                                                       | 1 = Yes<br>2 = No                                                                                                                                                                                        |             | _____              |
|                                                       | D. Car/Van/Suzuki for commercial use                                              | 1 = Yes<br>2 = No<br><br>If yes, how many                                                                                                                                                                |             | _____<br><br>_____ |

|                         |                                           |  |             |
|-------------------------|-------------------------------------------|--|-------------|
| E. Car for personal use | 1 = Yes<br>2 = No<br><br>If yes, how many |  | <hr/> <hr/> |
| F. Motor cycle/scooter  | 1 = Yes<br>2 = No<br><br>If yes, how many |  | <hr/> <hr/> |
| G. Video player/VCD     | 1 = Yes<br>2 = No<br><br>If yes, how many |  | <hr/> <hr/> |
| H. Television           | 1 = Yes<br>2 = No<br><br>If yes, how many |  | <hr/> <hr/> |
| I. TV cable             | 1 = Yes<br>2 = No                         |  | <hr/>       |
| J. Refrigerator         | 1 = Yes<br>2 = No<br><br>If yes, how many |  | <hr/> <hr/> |
| K. Washing Machine      | 1 = Yes<br>2 = No<br><br>If yes, how many |  | <hr/> <hr/> |
| L. Telephone            | 1 = Yes<br>2 = No<br><br>If yes, how many |  | <hr/> <hr/> |
| P. Electric Fan         | 1 = Yes                                   |  | <hr/>       |

|           |                                                                                    |                                                                                                                                                    |  |                |
|-----------|------------------------------------------------------------------------------------|----------------------------------------------------------------------------------------------------------------------------------------------------|--|----------------|
|           |                                                                                    | 2 = No<br>If yes, how many                                                                                                                         |  | _____          |
|           | N. Electric Iron                                                                   | 1 = Yes<br>2 = No<br>If yes, how many                                                                                                              |  | _____<br>_____ |
| <b>C5</b> | What type of fuel does your household mainly use for cooking?                      | 1=Electricity<br>2=Sui gas<br>3=Burshane<br>4=Kerosene<br>5=Coal<br>6=Charcoal<br>7=Firewood<br>8=Cow dung<br>9=Food from hotel<br>Others(specify) |  | -----          |
| <b>C6</b> | How is your house constructed?                                                     | 1=Cemented<br>2=Wall cemented but roof uncemented<br>3=Uncemented<br>4=Wooden house<br>5=Slum                                                      |  | -----          |
| <b>C7</b> | What is the temporary source of light in the absence of electricity in your house? | 1=Generator<br>2=UPS<br>3=Emergency light<br>4=Gas light<br>5=Lantern<br>6=Candle<br>7=Nothing<br>Others specify                                   |  | -----          |

| <b>PERSONAL INFORMATION</b> |                                                                                                    |                                                     |             |                                  |
|-----------------------------|----------------------------------------------------------------------------------------------------|-----------------------------------------------------|-------------|----------------------------------|
| <b>S.No</b>                 | <b>Questions</b>                                                                                   | <b>Coding</b>                                       | <b>Skip</b> | <b>Response</b>                  |
| <b>D1</b>                   | What is your age in years?<br>(Give them hint like how older were you at the time of independence) |                                                     |             | Confirm with B5 as well<br>----- |
| <b>D2</b>                   | What is your birth place?                                                                          | 1=Karachi<br>2=Interior Sindh<br>3=Punjab<br>4=NWFP |             | -----                            |



|           |                                                 |                                                                                                                                                                                                                                                                                      |                         |            |
|-----------|-------------------------------------------------|--------------------------------------------------------------------------------------------------------------------------------------------------------------------------------------------------------------------------------------------------------------------------------------|-------------------------|------------|
|           |                                                 | 5=Balochistan<br>6=Kashmir<br>7=Tribal areas<br>8=Northern areas<br>9=India<br>10=Abroad (other than India)                                                                                                                                                                          |                         |            |
| <b>D3</b> | What is your Education level?                   | 1=Illiterate<br>2=Literate (no formal schooling)<br>3=Upto 5 <sup>th</sup><br>4=Upto Matric<br>5=11-14 class<br>6=MA/MSc./MBBS/<br>MBA or above<br>88= don't know<br>99=no response<br>Others specify                                                                                |                         | -----      |
| <b>D4</b> | How many live births you/ your wife got?        |                                                                                                                                                                                                                                                                                      | If none than skip to D6 | -----      |
| <b>D5</b> | How many children are still alive?              |                                                                                                                                                                                                                                                                                      |                         | -----      |
| <b>D6</b> | Do you think children are security for future?  | 1=Yes<br>2=No<br>88=Don't know                                                                                                                                                                                                                                                       |                         | -<br>----- |
| <b>D7</b> | With whom you live whether nuclear or extended? | 1=Extended (with married son/sons<br>2=Extended (with married daughter/daughters<br>3= Extended (with other relatives-not own children)<br>4= Extended (with own children and other relatives)<br>5= Extended (with unmarried children)<br>6=With spouse<br>7=Alone<br>Other specify |                         | -----      |
| <b>D8</b> | Do you have separate room                       | 1 = Yes                                                                                                                                                                                                                                                                              |                         | -----      |

|            |                                                                                                                                                |                                                                                                                                                                                       |                                          |       |
|------------|------------------------------------------------------------------------------------------------------------------------------------------------|---------------------------------------------------------------------------------------------------------------------------------------------------------------------------------------|------------------------------------------|-------|
|            | for sleeping purposes just for you and/or your spouse (if present)                                                                             | 2 = No<br>99 = No response                                                                                                                                                            |                                          |       |
| <b>D9</b>  | What is your mother tongue?                                                                                                                    | 1=Urdu<br>2=Sindhi<br>3=Punjabi<br>4=Balochi<br>5=Pashto<br>6=Hindko<br>7=Saarki<br>8=Gujrati<br>9=Memon<br>10=Katchi<br>11=Gorshi<br>12=Marwari<br>13=Rajhistani<br>Others (specify) |                                          | ----- |
| <b>D10</b> | Do you work to earn money?                                                                                                                     | 1=Yes<br>2=No<br>88=Don't know<br>99=No response                                                                                                                                      | If no, then skip to D12                  | ----- |
| <b>D11</b> | If working to earn, what is your total monthly income from all sources?                                                                        | 88 = Don't know<br>99 =No response                                                                                                                                                    | Skip to D13                              | ----- |
| <b>D12</b> | If not working to earn, what is your total monthly income from all sources? (e.g.: pension, from children, home rentals, business income etc.) | 88 = Don't know<br>99 =No response                                                                                                                                                    |                                          | ----- |
| <b>D13</b> | Have you ever been married?                                                                                                                    | 1=Yes,<br>2=No                                                                                                                                                                        | If no, then skip to D37                  | ----- |
| <b>D14</b> | How many years you have been or were married?                                                                                                  | 88 = Don't know<br>99 =No response                                                                                                                                                    |                                          | ----- |
| <b>D15</b> | What is your current Marital Status?                                                                                                           | 1=Married<br>2=Widowed<br>3=Separated<br>4=Divorced                                                                                                                                   | If answer other than married skip to D17 | ----- |

|            |                                                                                                                |                                    |                           |       |
|------------|----------------------------------------------------------------------------------------------------------------|------------------------------------|---------------------------|-------|
| <b>D16</b> | If married how long you have been married with your present spouse? (years)                                    | 88 = Don't know<br>99 =No response | Skip to D18               | ----- |
| <b>D17</b> | If widowed or separated or divorced, how long you have been widowed/widower or separated or divorced? (years)  | 88 = Don't know<br>99 =No response |                           | ----- |
| <b>D18</b> | How many adult (above 18 years) children do you have who are alive?                                            |                                    | If none, then skip to D37 | ----- |
| <b>D19</b> | How many are sons that are above 18 years?                                                                     |                                    |                           | ----- |
| <b>D20</b> | How many are daughters that are above 18 years?                                                                |                                    |                           | ----- |
| <b>D21</b> | How many of your adult (above 18 years) children are living with you?                                          |                                    |                           | ----- |
| <b>D22</b> | Do you have any of your adult (above 18 years) children who are living in this moholla but not with you?       | 1 = Yes<br>2 = No                  | If no or skip to D24      | ----- |
| <b>D23</b> | How many of your adult (above 18 years) children are living in this Moholla but not with you?                  |                                    |                           | ----- |
| <b>D24</b> | Do you have any of your adult (above 18 years) children who are living else where in Karachi but not with you? | 1 = Yes<br>2 = No                  | If no skip to D26         | ----- |
| <b>D25</b> | How many of your adult (above 18 years) children are living else where in Karachi but not with you?            |                                    |                           | ----- |
| <b>D26</b> | Do you have any of your adult (above 18 years) children who are living else where in Pakistan?                 | 1 = Yes<br>2 = No                  | If no skip to D28         | ----- |
| <b>D27</b> | How many of your adult (above 18 years) children are living else where in Pakistan?                            |                                    |                           | ----- |
| <b>D28</b> | Do you have any of your adult (above 18 years) children who are living abroad?                                 | 1 = Yes<br>2 = No                  | If no skip to D35         | ----- |
| <b>D29</b> | How many of your adult                                                                                         |                                    |                           | ----- |

|            |                                                                                          |                                                                                                                                                            |                                                            |                                      |
|------------|------------------------------------------------------------------------------------------|------------------------------------------------------------------------------------------------------------------------------------------------------------|------------------------------------------------------------|--------------------------------------|
|            | (above 18 years) children are living abroad?                                             |                                                                                                                                                            |                                                            | -----                                |
| <b>D30</b> | Do you miss your adult (above 18 years) children who are living outside Pakistan?        | 1=Yes<br>2=No                                                                                                                                              | If No skip to D32                                          | -----                                |
| <b>D31</b> | If yes, how much do you miss them?                                                       | 1=Very often<br>2=Whenever I am lonely<br>3=Rarely<br>88=Don't know/can't say                                                                              |                                                            | -----                                |
| <b>D32</b> | Do you get telephone calls from them or you call them?                                   | 1 = I neither call them nor they do<br>2 = I call them<br>3 = They call me<br>4 = We both call each other                                                  | If 2 or 4 then ask D33, If 3 skip to D34, If 1 skip to D35 | -----                                |
| <b>D33</b> | How often do you call them?                                                              | 1=Daily<br>2= Weekly<br>3=Twice a week<br>4=Once in a month<br>5=Once in 3 months<br>6=Once in 6 months<br>7=Once in a year<br>8=Not done<br>Other specify |                                                            | -----                                |
| <b>D34</b> | How often do they call you?                                                              | 1=Daily<br>2= Weekly<br>3=Twice a week<br>4=Once in a month<br>5=Once in 3 months<br>6=Once in 6 months<br>7=Once in a year<br>8=Not done<br>Other specify |                                                            | -----                                |
| <b>D35</b> | How often your children living inside moholla our elsewhere in Karachi pay visit to you? | 1=Daily<br>2= Weekly<br>3=Twice a week<br>4=Once in a month<br>5=Once in 3 months<br>6=Once in 6 months<br>7=Once in a year<br>8=Not done<br>Other specify |                                                            | Moholla<br>-----<br>Karachi<br>----- |
| <b>D36</b> | How often do you pay visit to                                                            | 1=Daily                                                                                                                                                    |                                                            |                                      |

|            |                                                                        |                                                                                                                                                 |  |                                      |
|------------|------------------------------------------------------------------------|-------------------------------------------------------------------------------------------------------------------------------------------------|--|--------------------------------------|
|            | your children living inside moholla our elsewhere in Karachi?          | 2= Weekly<br>3=Twice a week<br>4=Once in a month<br>5=Once in 3 months<br>6=Once in 6 months<br>7=Once in a year<br>8=Not done<br>Other specify |  | Moholla<br>-----<br>Karachi<br>----- |
| <b>D37</b> | How would you rate your health at present time?                        | 1=Very good<br>2=Fairly good<br>3=Good<br>4=Poor<br>88=Can't say/don't know<br>99=No response                                                   |  | -----                                |
| <b>D38</b> | How your functional Health is today compared to what it was last year? | 1=Better<br>2=About the same<br>3=Worse<br>88=Can't say/don't know<br>99=No response                                                            |  | -----                                |

| <b>ASSESSMENT OF PHYSICAL ACTIVITY</b> |                                                                                                                                                         |                                                      |             |                 |
|----------------------------------------|---------------------------------------------------------------------------------------------------------------------------------------------------------|------------------------------------------------------|-------------|-----------------|
| <b>Upper Extremity Domain</b>          |                                                                                                                                                         |                                                      |             |                 |
| <b>S.No</b>                            | <b>Questions</b>                                                                                                                                        | <b>Coding</b>                                        | <b>Skip</b> | <b>Response</b> |
| E1                                     | By yourself do you have any difficulty raising your arms up over your head? If yes since how long? (mention in days, weeks, months)                     | 1= Yes<br>2= No<br>88= Don't Know<br>99= No Response |             | -----           |
| E2                                     | By yourself do you have any difficulty using your fingers to grasp or handle? If yes since how long? (mention in days, weeks, months)                   | 1= Yes<br>2= No<br>88= Don't Know<br>99= No Response |             | -----           |
| E3                                     | By yourself do you have any difficulty lifting or carrying something as heavy as 5 kilogrammes? If yes since how long? (mention in days, weeks, months) | 1= Yes<br>2= No<br>88= Don't Know<br>99= No Response |             | -----           |
| <b>Lower Extremity Domain</b>          |                                                                                                                                                         |                                                      |             |                 |
| <b>S.No</b>                            | <b>Questions</b>                                                                                                                                        | <b>Coding</b>                                        | <b>Skip</b> | <b>Response</b> |
| E4                                     | By yourself do you have any difficulty walking for about 200-250 yards? If yes since how long? (mention in days, weeks, months)                         | 1= Yes<br>2= No<br>88= Don't Know<br>99= No Response |             | -----           |
| E5                                     | By yourself do you have any difficulty walking up to 10-15 steps without resting? If yes since how long? (mention                                       | 1= Yes<br>2= No<br>88= Don't Know                    |             | -----           |

|                    | in days, weeks, months)                                                                                                                                                                                                                         | 99= No Response                                      |             |                 |
|--------------------|-------------------------------------------------------------------------------------------------------------------------------------------------------------------------------------------------------------------------------------------------|------------------------------------------------------|-------------|-----------------|
| E6                 | By yourself do you have any difficulty getting in and out of bed or chairs/table? If yes since how long? (mention in days, weeks, months)                                                                                                       | 1= Yes<br>2= No<br>88= Don't Know<br>99= No Response |             | -----           |
| <b>ADL Domain</b>  |                                                                                                                                                                                                                                                 |                                                      |             |                 |
| <b>S.No</b>        | <b>Questions</b>                                                                                                                                                                                                                                | <b>Coding</b>                                        | <b>Skip</b> | <b>Response</b> |
| E7                 | By yourself that is without help from others or special equipment do you have any difficulty in bathing or showering? If yes since how long? (mention in days, weeks, months)                                                                   | 1= Yes<br>2= No<br>88= Don't Know<br>99= No Response |             | -----           |
| E8                 | By yourself that is without help from others or special equipment do you have any difficulty in dressing? If yes since how long? (mention in days, weeks, months)                                                                               | 1= Yes<br>2= No<br>88= Don't Know<br>99= No Response |             | -----           |
| E9                 | By yourself that is without help from others or special equipment do you have any difficulty in eating, for example: holding folk or spoon, cutting your food or drinking from a glass? If yes since how long? (mention in days, weeks, months) | 1= Yes<br>2= No<br>88= Don't Know<br>99= No Response |             | -----           |
| E10                | By yourself that is without help from others or special equipment do you have any difficulty using the toilet, including getting up from the toilet seat or commode? If yes since how long? (mention in days, weeks, months)                    | 1= Yes<br>2= No<br>88= Don't Know<br>99= No Response |             | -----           |
| <b>IADL Domain</b> |                                                                                                                                                                                                                                                 |                                                      |             |                 |
| <b>S.No</b>        | <b>Questions</b>                                                                                                                                                                                                                                | <b>Coding</b>                                        | <b>Skip</b> | <b>Response</b> |
| E11                | Because of your health status do you have difficulty in using telephone? If yes since how long? (mention in days, weeks, months)                                                                                                                | 1= Yes<br>2= No<br>88= Don't Know<br>99= No Response |             | -----           |
| E12                | Because of your health status do you have difficulty doing light house work like washing dishes, light cleaning etc? If yes since how long? (mention in days, weeks, months)                                                                    | 1= Yes<br>2= No<br>88= Don't Know<br>99= No Response |             | -----           |
| E13                | Because of your health status do you have difficulty doing heavy household work like washing clothes or cleaning floor etc? If yes since how long? (mention in days, weeks, months)                                                             | 1= Yes<br>2= No<br>88= Don't Know<br>99= No Response |             | -----           |
| E14                | Do you have difficulty preparing your own meal? If yes since how long? (mention in days, weeks, months)                                                                                                                                         | 1= Yes<br>2= No<br>88= Don't Know                    |             | -----           |

|                         |                                                                                                                                                                                            | 99= No Response                                                                |                                 |                 |
|-------------------------|--------------------------------------------------------------------------------------------------------------------------------------------------------------------------------------------|--------------------------------------------------------------------------------|---------------------------------|-----------------|
| E15                     | Will (Do) you have difficulty if need to go for (going for) shopping for your personal items including vegetables or medicine etc? If yes since how long? (mention in days, weeks, months) | 1= Yes<br>2= No<br>88= Don't Know<br>99= No Response                           |                                 | -----           |
| <b>Other Activities</b> |                                                                                                                                                                                            |                                                                                |                                 |                 |
| <b>S.No</b>             | <b>Questions</b>                                                                                                                                                                           | <b>Coding</b>                                                                  | <b>Skip</b>                     | <b>Response</b> |
| E16                     | Do you go to walk for pleasure or exercise?                                                                                                                                                | 1= Yes<br>2= No                                                                | If No,<br>skip to<br>E20        |                 |
| E17                     | During an average week, how many hours do you spend walking for pleasure or exercise?                                                                                                      |                                                                                |                                 | _____           |
|                         |                                                                                                                                                                                            |                                                                                |                                 | Hrs             |
| E18                     | Since how long you have been going for walking?                                                                                                                                            | 88=Don't know                                                                  |                                 | _____           |
|                         |                                                                                                                                                                                            |                                                                                |                                 | Months          |
|                         |                                                                                                                                                                                            |                                                                                |                                 | _____           |
|                         |                                                                                                                                                                                            |                                                                                |                                 | Years           |
| E19                     | When you walk for pleasure or exercise what usually happens to the rate or depth of your breathing?                                                                                        | 1= No change<br>2= Slight increase<br>3=Moderate increase<br>4=Severe increase | Skip to<br>E21                  | _____           |
| E20                     | Since how long you have not been going for walking?                                                                                                                                        | 88=Don't know                                                                  |                                 | _____           |
|                         |                                                                                                                                                                                            |                                                                                |                                 | Months          |
|                         |                                                                                                                                                                                            |                                                                                |                                 | _____           |
|                         |                                                                                                                                                                                            |                                                                                |                                 | Years           |
| E21                     | Do you lift or carry objects that are as heavy as 5 kg? (do not include lifting or carrying objects at work place)                                                                         | 1= Yes<br>2= No                                                                | If no<br>then<br>skip to<br>E23 | _____           |
| E22                     | During an average week, how much time do you spend lifting or carrying objects as heavy as 5 kg? (do not include time spent lifting or carrying objects at work place)                     |                                                                                |                                 | _____           |
|                         |                                                                                                                                                                                            |                                                                                |                                 | Min             |
|                         |                                                                                                                                                                                            |                                                                                |                                 | _____           |
|                         |                                                                                                                                                                                            |                                                                                |                                 | Hrs             |
| E23                     | Which of the following four activity classes best describes your present activity outside? Please consider to and from work and other physical effort during your leisure time?            | 1= No weekly physical activity<br>2=Only light physical activity in most weeks |                                 |                 |

|                                         |                                                                                                                   |                                                                                                                                                                                                                           |                    |                              |
|-----------------------------------------|-------------------------------------------------------------------------------------------------------------------|---------------------------------------------------------------------------------------------------------------------------------------------------------------------------------------------------------------------------|--------------------|------------------------------|
|                                         |                                                                                                                   | 3=Vigorous physical activity at least 20 mins or twice a week (vigorous activity causes shortness of breath, a rapid heart rate & sweating)<br>4=Vigorous physical activity for at least 20 minutes 3 or > times per week |                    |                              |
| E24                                     | Do you go to meet any of your relative or friend?                                                                 | 1= Yes<br>2= No                                                                                                                                                                                                           | If no skip to E26  |                              |
| E25                                     | During an average week, how much time do you spend meeting your friends or relatives?                             |                                                                                                                                                                                                                           |                    | _____<br>Min<br>_____<br>Hrs |
| E26                                     | Do you spend time in performing various activities like gardening etc?                                            | 1= Yes<br>2= No                                                                                                                                                                                                           | If no skip to E228 | _____<br>Hrs                 |
| E27                                     | During an average week, how much time do you spend performing various activities like gardening etc?              |                                                                                                                                                                                                                           |                    | _____<br>Min<br>_____<br>Hrs |
| E28                                     | Do you go outside home for any other purpose example to purchase items etc?                                       | 1 = Yes<br>2 = No                                                                                                                                                                                                         | If no skip to E30  | _____<br>Hrs                 |
| E29                                     | During an average week, how much time do you spend going out for any other purpose example to purchase items etc? |                                                                                                                                                                                                                           |                    | _____<br>Min<br>_____<br>Hrs |
| <b>Working or Employment Activities</b> |                                                                                                                   |                                                                                                                                                                                                                           |                    |                              |
| <b>S.No</b>                             | <b>Questions</b>                                                                                                  | <b>Coding</b>                                                                                                                                                                                                             | <b>Skip</b>        | <b>Response</b>              |
| E30                                     | Are you employed?                                                                                                 | 1=Yes<br>2=No                                                                                                                                                                                                             | If yes skip to E32 | _____                        |
|                                         |                                                                                                                   |                                                                                                                                                                                                                           |                    |                              |



|     |                                                                                               |                                           |            |                                                                                       |
|-----|-----------------------------------------------------------------------------------------------|-------------------------------------------|------------|---------------------------------------------------------------------------------------|
| E31 | If not working, then when you left working (in months or years)?                              |                                           | Skip to F1 | <hr/> Months <hr/> Years                                                              |
| E32 | How many hours do you work during a typical day?                                              | 88=Can't say/don't know<br>99=No response |            | <hr/> Hrs                                                                             |
| E33 | How many days do you work during a typical week?                                              | 88=Can't say/don't know<br>99=No response |            | <hr/> Days                                                                            |
| E34 | How much time during work do you spend standing or sitting?                                   |                                           |            | <b>Standing</b><br><hr/> Min<br><hr/> Hrs<br><b>Sitting</b><br><hr/> Min<br><hr/> Hrs |
| E35 | How much time during work do you spend walking? (don't include time of from and to work)      |                                           |            | <hr/> Min<br><hr/> Hrs                                                                |
| E36 | How much time during work do you spend lifting weight up to 5kg or doing exercises like this? |                                           |            | <hr/> Min<br><hr/> Hrs                                                                |

| <b>ASSESSMENT OF DEPRESSION (GDS)</b> |                                                                            |                |             |                 |
|---------------------------------------|----------------------------------------------------------------------------|----------------|-------------|-----------------|
| <b>S.No</b>                           | <b>Questions</b>                                                           | <b>Coding</b>  | <b>Skip</b> | <b>Response</b> |
| F1                                    | Are you basically satisfied with your life?                                | 0= No<br>1=Yes |             |                 |
| F2                                    | Have you dropped many of your activities and interests?                    | 0= No<br>1=Yes |             |                 |
| F3                                    | Do you feel that your life is empty?                                       | 0= No<br>1=Yes |             |                 |
| F4                                    | Do you often get bored?                                                    | 0= No<br>1=Yes |             |                 |
| F5                                    | Are you in good spirits most of the time?                                  | 0= No<br>1=Yes |             |                 |
| F6                                    | Are you afraid that something bad is going to happen to you?               | 0= No<br>1=Yes |             |                 |
| F7                                    | Do you feel happy most of the time?                                        | 0= No<br>1=Yes |             |                 |
| F8                                    | Do you often feel helpless?                                                | 0= No<br>1=Yes |             |                 |
| F9                                    | Do you prefer to stay at home, rather than going out and doing new things? | 0= No<br>1=Yes |             |                 |
| F10                                   | Do you feel that you have more problems with memory than most?             | 0= No<br>1=Yes |             |                 |
| F11                                   | Do you think it is wonderful to be alive now?                              | 0= No<br>1=Yes |             |                 |
| F12                                   | Do you feel pretty worthless the way you are now?                          | 0= No<br>1=Yes |             |                 |
| F13                                   | Do you feel full of energy?                                                | 0= No<br>1=Yes |             |                 |
| F14                                   | Do you feel that your situation is hopeless?                               | 0= No<br>1=Yes |             |                 |
| F15                                   | Do you think that most people are better off than you are?                 | 0= No<br>1=Yes |             |                 |
